# Supplementary material for: Rational catalyst layer design enables tailored transport channels for efficient CO2 electrochemical reduction to multi-carbon products
Source: Royal Society of Chemistry journal article supplement (doi:10.1039/d4ee03743j), 2024-12-05
Supplement: d4ee03743j1.pdf [file d4ee03743j1.pdf]

## Supporting Information

### **Rational Catalyst Layers Design Enables Tailored Transport Channels for Efficient CO<sub>2</sub> Electrochemical Reduction to Multi-carbon Products**

Jiping Sun <sup>a, b</sup>, Bichao Wu <sup>a</sup>, Zhixing Wang <sup>a, c</sup>, Huajun Guo <sup>a, c</sup>, Guochun Yan <sup>a, c</sup>, Hui Duan <sup>a, c</sup>, Guangchao Li <sup>a, c</sup>, Ying Wang <sup>b, \*</sup> and Jiexi Wang <sup>a, c, \*</sup>

<sup>a</sup> *National Energy Metal Resources and New Materials Key Laboratory, Engineering Research Center of the Ministry of Education for Advanced Battery Materials, Hunan Provincial Key Laboratory of Nonferrous Value-Added Metallurgy, School of Metallurgy and Environment, Central South University, Changsha 410083, P. R. China.*

<sup>b</sup> *Department of Chemistry, The Chinese University of Hong Kong, Hong Kong 999077, S. A. R., China.*

<sup>c</sup> *National Engineering Research Centre of Advanced Energy Storage Materials, Changsha, 410205, P. R. China.*

\* Corresponding author, email address: Ying Wang, [ying.b.wang@cuhk.edu.hk](mailto:ying.b.wang@cuhk.edu.hk); Jiexi Wang, [wangjiexikeen@csu.edu.cn](mailto:wangjiexikeen@csu.edu.cn).

## Experimental Section

### Chemicals and materials

Copper nanoparticle (Cu NPs, Sigma, 25 nm), SSC-D72 ionomer (Aquivion, D72-25BS), SSC-D79 ionomer (Aquivion, D72-25BS), LSC-D520 ionomer (DuPont, D-520, 5 wt%), LSC-D521 ionomer (Dupont, D-521, 5 wt%), Isopropanol (IPA, Hushi, AR,  $\geq 99.7\%$ ), Deionized water (DIW, 18.25 M $\Omega$  cm), Potassium bicarbonate (Aladdin, AR, 99.5%), Dimethyl sulfoxide (DMSO, Sigma, anhydrous,  $\geq 99.9\%$ ), Deuterated water (D<sub>2</sub>O, Aladdin, 99.9 atom % D), Carbon paper (GDL, Sinero, YLS-30T), Anion-exchange membrane (AEM, Dioxide Materials, Sustainion X37-50 Grade RT, 50  $\mu$ m), and Anion-exchange membrane (AEM, Alkylmer, W-25, 25  $\mu$ m). All the chemical reagents and materials were purchased from commercial suppliers and used as received.

### Preparation of Cu-GDE

Taking D520-20/1 as an example, 20 mg Cu NPs, 215  $\mu$ L LSC-D520 ionomer solution (10 times diluted, the ionomer/catalyst mass ratio is 1/20) and 1785  $\mu$ L solvent (Isopropanol: H<sub>2</sub>O = 2:1, volume ratio) were mixed and sonicated for 1 hour in cold water to prepare the uniform catalyst ink. To prevent errors caused by the viscosity of the ionomer solution, all ionomer solutions were used after dilution. The inks with different SSC and LSC ionomers were marked as SSC-D72, SSC-D79, LSC-D520, and LSC-D521 according to the ionomer type. The ionomer content was regulated to obtain ink with different C/I ratios. The inks of LSC-D520 with different C/I ratios were prepared and named D520-5/1, 10/1, 20/1, and 40/1. The GDEs were prepared by spraying catalyst ink onto carbon paper GDLs at the speed of 2000 mm min<sup>-1</sup>. High-purity nitrogen (N<sub>2</sub>) was used as a spray carrier gas to prevent GDE pollution. The cathode GDEs were obtained after vacuum drying overnight at 40 °C. The effective geometric area of Cu-GDEs was 4 cm<sup>2</sup> (2cm $\times$ 2cm) and the actual catalyst loading was controlled at around 0.5 mg cm<sup>-2</sup>. For the amplification experiments, the

effective geometric area of the cathode GDE was 81 cm<sup>2</sup> (9cm×9cm) with a loading of 0.5 mg cm<sup>-2</sup>.

### **Materials characterization**

A double Spherical Aberration Corrected Transmission Electron Microscope (AC-TEM, Titan G2 60-300) coupled with an energy dispersive spectrometer (EDS) and HAADF-STEM was employed to characterize the morphology of the catalyst ink. Dynamic Light Scattering (DLS, Malvern Zetasizer Nano ZS90) was used to detect the colloidal particle size of the ink. Thus, the hydrodynamic diameter ( $D_h$ ) and particle size distribution of the ink were obtained. 5  $\mu$ L ink was diluted with 5 mL solvent (Isopropanol: H<sub>2</sub>O= 2:1, volume ratio) to avoid light scattering. A modular Compact Rheometer (MCR, Anton Paar MCR 302e) was adopted to carry out the rheological measurements of the catalyst ink. Atomic Force Microscope (AFM, Bruker Dimension Edge™) was employed to obtain the surface geometry imaging of CLs. Cu foil was chosen as the substrate, and the catalyst ink was dripped onto the smooth blank Cu foil. Scanning Electron Microscope (SEM, JEOL JSM-7900F) coupled with EDS was used to characterize the morphology of the Cu-GDE. The contact angle test was carried out to evaluate the hydrophilicity of the CL surface. Wide Angle X-ray scattering apparatus (WAXS, Xenocs Xeuss 2.0) with detector (Pilatus 3R 300K) and Raman spectrum (Raman, Thermo Scientific DXR) were used to characterize the electronic structure of GDEs. The surface chemical structure of the GDEs was determined by X-ray Photoelectron Spectroscopy (XPS, Thermo Scientific ESCALAB Xi+) with Al K $\alpha$  radiation. All the spectra were calibrated against C 1s (284.8 eV). The pore size distribution of GDEs was detected by the high-performance automatic mercury injection instrument (MIP, Micromeritics AutoPore IV 9510). All the tests were carried out at room temperature (25 °C).

### **Calculation method**

The density functional theory (DFT) calculation method was used to evaluate the adsorption energy of LSC and SSC ionomers with CO<sub>2</sub> and H<sub>2</sub>O. The CASTEP first-principles implementation was employed for the calculations. The exchange-correlation potential was calculated using the generalized gradient approximation (GGA) with the Perdew–Burke–Ernzerhof (PBE) formula, in conjunction with the DFT-D correction. The Broyden–Fletcher–Goldfarb–Shanno (BFGS) method was employed to identify the ground state of the supercells, and the convergence tolerance was set to an energy change of less than 10<sup>-5</sup> eV. The cutoff energy of the atomic wave functions was set to 450 eV. Subsequently, all molecular structures were calculated following the completion of the geometry optimization process.

### **Molecular dynamics simulation**

Molecular dynamics (MD) simulation was employed to model the appetency of different ionomers with CO<sub>2</sub> and H<sub>2</sub>O in the catalyst layer. The simulation condition was 298.15 K at 1 atm using the COMPASS III force field with force type and charges. A further 5 ns was run to collect data for statistical analysis in the NVT ensemble once the system was fully equilibrated. The degree of the polymerization of the ionomers is 10, and the solvent system employed in the actual experiments corresponds to this value (isopropanol/water = 2:1, volume ratio).

### **In-situ Surface-enhanced infrared spectroscopy (In-situ ATR-SEIRAS)**

The ATR-SEIRAS technique was employed using a Nicolet iS50 FTIR spectrometer, equipped with a narrow-band MCT-A detector and an in-situ IR optical accessory (SPEC-II, Shanghai Yuanfang Tech.), at an incidence angle of approximately 60°. CO<sub>2</sub> gas was introduced at room temperature, and the background spectrum was collected 20 min after the introduction of CO<sub>2</sub>. The electrolyte was a CO<sub>2</sub>-saturated 0.1M KHCO<sub>3</sub> solution, with a platinum mesh and a saturated calomel electrode used as the counter electrode (CE) and the

reference electrode (RE), respectively. The IR spectra were collected with unpolarised IR radiation at a spectral resolution of  $16\text{ cm}^{-1}$ . All spectra were presented in absorbance, defined as the negative natural logarithm of the ratio of the sample and reference single-beam spectra, respectively. A CHI 440 electrochemistry workstation (CH Instruments, Inc.) was employed for potential control and current measurements.

### **Electrochemical measurements**

The electrochemical measurements were conducted in an MEA-based electrolyzer. MEA was assembled by two electrode plates, Cu-GDE cathode, anion-exchange membrane (AEM),  $\text{IrO}_2/\text{Ti}$  anode, and tetrafluoride gaskets. The flow field plates of the cathode and anode were titanium metal plates. A cation exchange ionomer (CEI) PFSA was employed as an ionomer binder to transfer protons and bond catalysts. The effective geometric area of the Cu-GDE cathode was  $4\text{ cm}^2$  ( $2\text{ cm} \times 2\text{ cm}$ ). For the amplification experiments, the effective geometric area of the cathode GDE was  $81\text{ cm}^2$  ( $9\text{ cm} \times 9\text{ cm}$ ). The Au-coated Cu plate was used in the cathode for current collecting. The  $\text{IrO}_2$ -coated Ti foam was used as the anode for the oxygen evolution reaction (OER), and  $\text{IrO}_2$  loading was  $2\text{ mg cm}^{-2}$ . A  $50\text{ }\mu\text{m}$  Sustainion AEM and a  $25\text{ }\mu\text{m}$  Alkymer AEM were employed to separate the cathode and anode in conditional inquiry tests and optimization tests respectively.  $0.1\text{ M KHCO}_3$  solution was adopted as anolyte with a flow rate of  $15\text{ mL min}^{-1}$ . High-purity carbon dioxide (99.99%, Linde) was continuously supplied to the backside of Cu-GDE at a flow rate of  $45\text{ sccm}$ . The  $\text{CO}_2$  gas was humidified in a  $50\text{ }^\circ\text{C}$  water bath and bubbled for a long time before the reaction started. The electrolysis was carried out at  $50\text{ }^\circ\text{C}$ . All the electrochemical measurements were conducted on a ZAHNER ZENNIUM pro potentiostat. The  $\text{CO}_2\text{RR}$  activity was tested by linear scanning voltammetry (LSV) methods. The  $\text{CO}_2\text{RR}$  selectivity and stability of Cu-GDEs were tested by chronoamperometry and chronopotentiometry methods. Cyclic voltammetry (CV) test at different scan rates of different ionomers was carried

out with the scan rate of 5, 10, 20, 40, 60, 80, 100, 120, 140 mV s<sup>-1</sup>. Electrochemical impedance spectroscopy (EIS) was employed at a constant potential and the frequency of 10 to 10000 Hz. As for the amplification experiments (81 cm<sup>2</sup>), the electrochemical measurements were conducted on a DC power supply (ABF KPS3020D 30V20A).

### Product analysis

Gas products were analyzed by an online gas chromatography (GC, Ramiin GC 2060) equipped with a TCD detector for H<sub>2</sub> and an FID detector for CO, CH<sub>4</sub>, and C<sub>2</sub>H<sub>4</sub>. Online differential electrochemical mass spectroscopy (DEMS, Pfeiffer PrismaPro QMG 250) was used to characterize the hydrogen evolution reaction (HER), CO<sub>2</sub>RR, and limiting current density of ethylene during LSV scanning. The calibration lines of GC and *in-situ* DEMS were both made by the external standard method. Liquid products were collected with flow-out electrolyte and analyzed by an offline <sup>1</sup>H nuclear magnetic resonance (NMR) spectrometer (Bruker AVANCE III HD 500), with dimethyl sulfoxide (DMSO) as an internal standard. The Faraday efficiencies (*FES*) of the products were calculated using the following formula:

$$FE_i = \frac{Q_i}{Q_{total}} = \frac{Z_i \times n_i \times F}{Q_{total}} \times 100\% \quad (1)$$

Where,

$Q_i$ : the charge used for a specific product i;

$Q_{total}$ : the total amount of charge passed during the electrolysis;

$Z_i$ : the molar amount of the product i;

$F$ : the Faradaic constant (96,485 C mol<sup>-1</sup>);

$n_i$ : the number of electron transfers when the product i is formed.

The partial current densities ( $J_i$ ) of the products were calculated using the following formula:

$$J_i = \frac{FE_i \times I}{S} = FE_i \times j \quad (2)$$

Where,

$FE_i$ : the Faraday Efficiencies of the products;

$I$ : the applied current of the system;

$S$ : effective geometric area of the Cu-GDE cathode;

$j$ : the applied current densities of the cathode.

The energy efficiencies ( $EEs$ ) of  $C_{2+}$  products were calculated using the following formula:

$$EE_{C2+} = \sum_i \frac{E_{0(i)} \times FE_i}{V_{cell}} \times 100\% \quad (3)$$

Where,

$V_{cell}$ : the applied cell potential of the MEA electrolyzer;

$E_{0(i)}$ : the equilibrium potential for different  $CO_2RR$ -to- $C_{2+}$  reactions;

$FE_i$ : the Faraday Efficiencies of various  $C_{2+}$  products.

The water flux ( $X_{H_2O}$ ) of the membrane in MEA at different current densities was quantified using the following formula<sup>1</sup>:

$$X_{H_2O, cathode} = X_{H_2O, total outlet} - X_{H_2O, CO_2 feed}$$

(4)

Where,

$X_{H_2O, total outlet}$ : the total water flux of the outlet which is used for the reaction;

$X_{H_2O, CO_2 feed}$ : the water flux contributed by the humidified  $CO_2$  feed.

## Figures

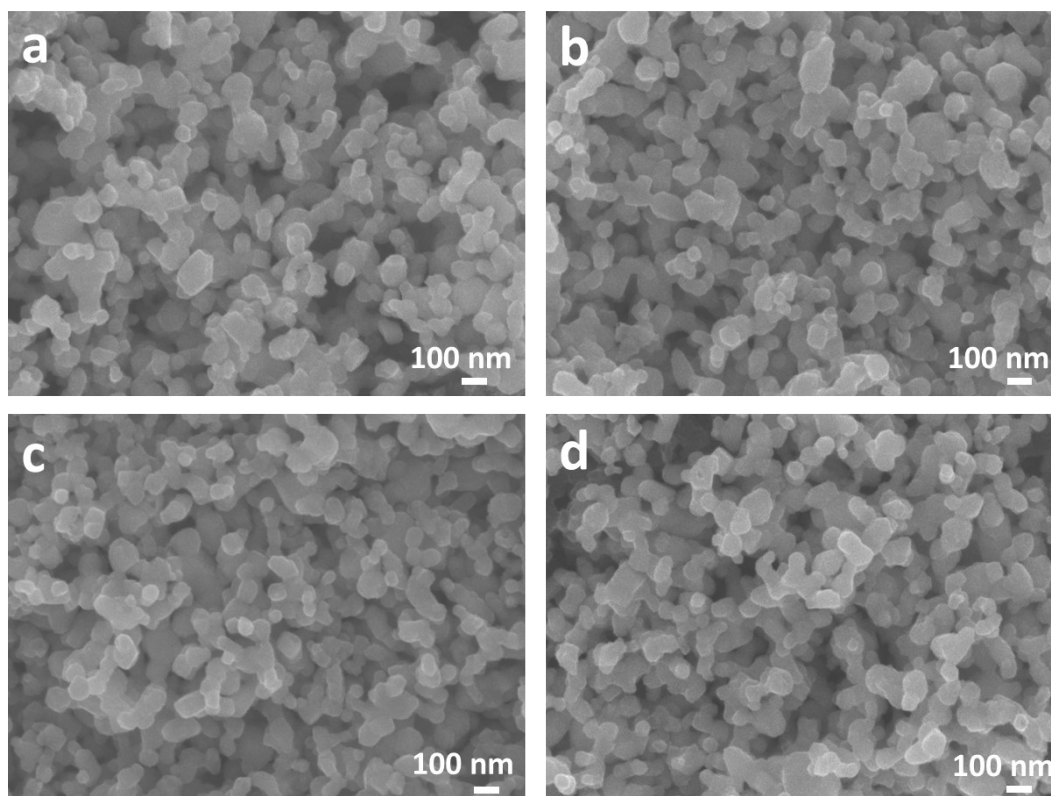

Fig. S1. SEM images of catalyst layers with different types of ionomers at C/I ratio of 10/1. (a) SSC-D72, (b) SSC-D79, (c) LSC-D520, and (d) LSC-D521.

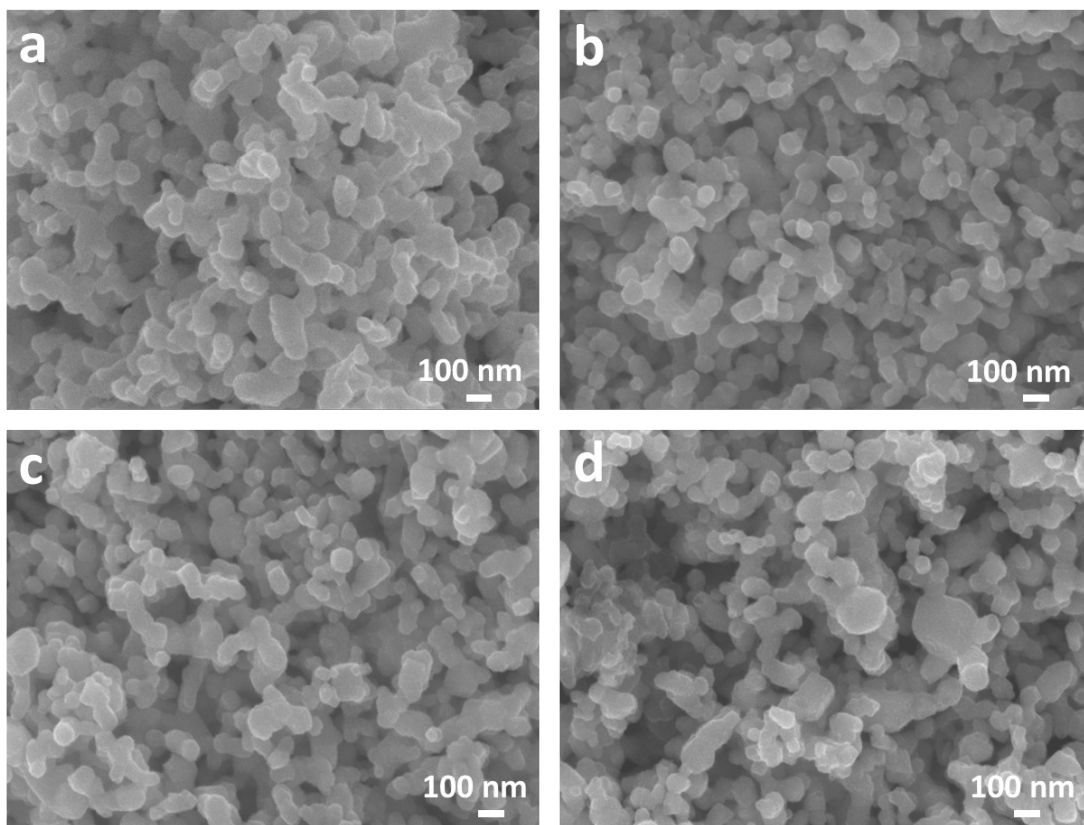

Fig. S2. SEM images of catalyst layers with different C/I ratios of LSC-D520. (a) C/I ratio= 5/1, (b) C/I ratio= 10/1, (c) C/I ratio= 20/1, and (d) C/I ratio= 40/1.

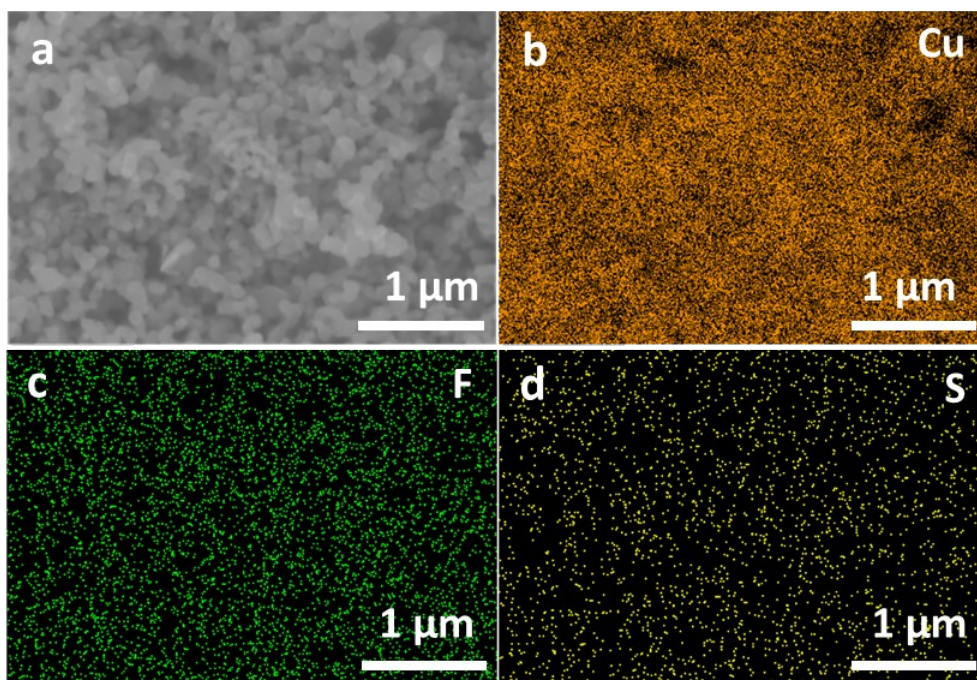

Fig. S3. SEM images and EDS mapping of the LSC-D520-20/1 gas diffusion electrode (GDE) surface. (a) Surface morphology; Surface elements distribution of (b) Cu, (c) F, and (d) S.

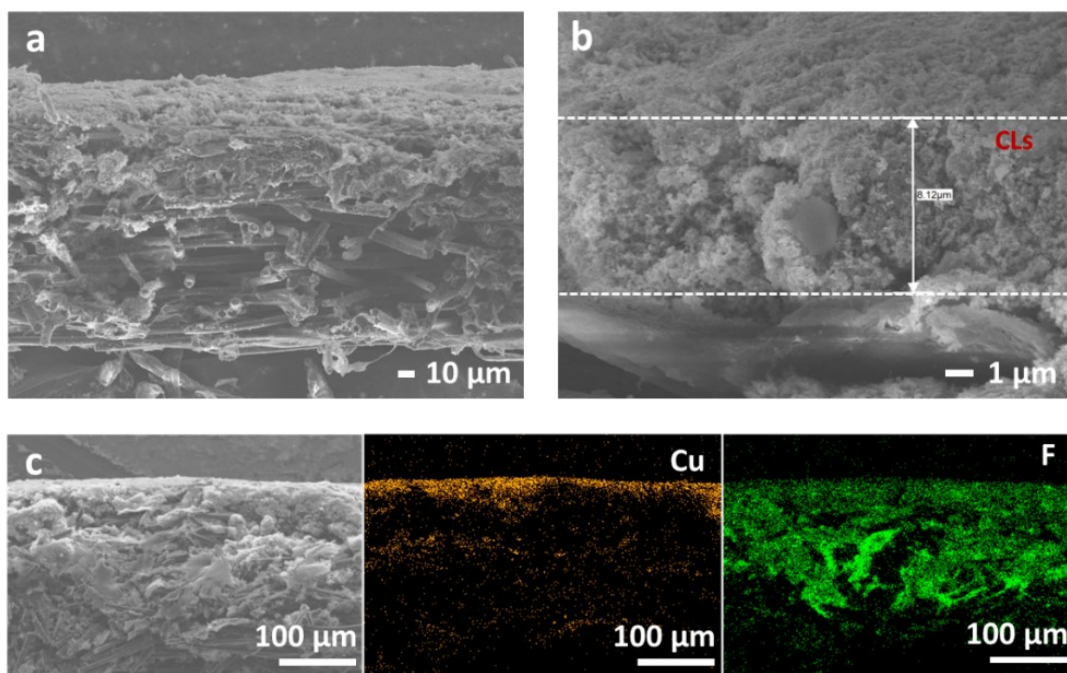

Fig. S4. SEM micrograph and EDS mapping of cross-section morphology of LSC-D520-20/1 GDE. (a-b) Cross-section microstructure; (c) Elements distribution of Cu and F.

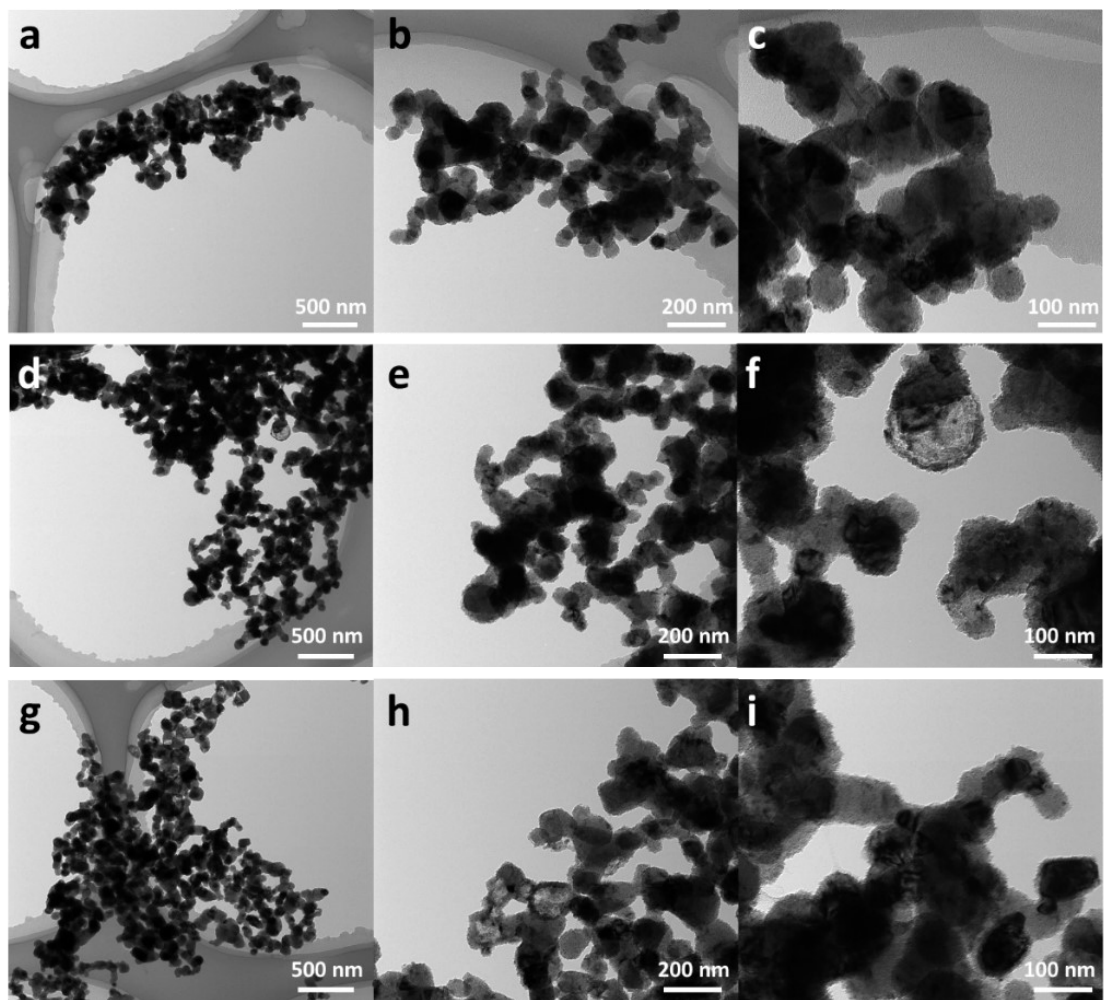

Fig. S5. AC-TEM micrograph of (a-c) SSC-D72, (d-f) SSC-D79, and (g-i) LSC-D521. (C/I ratio=10/1)

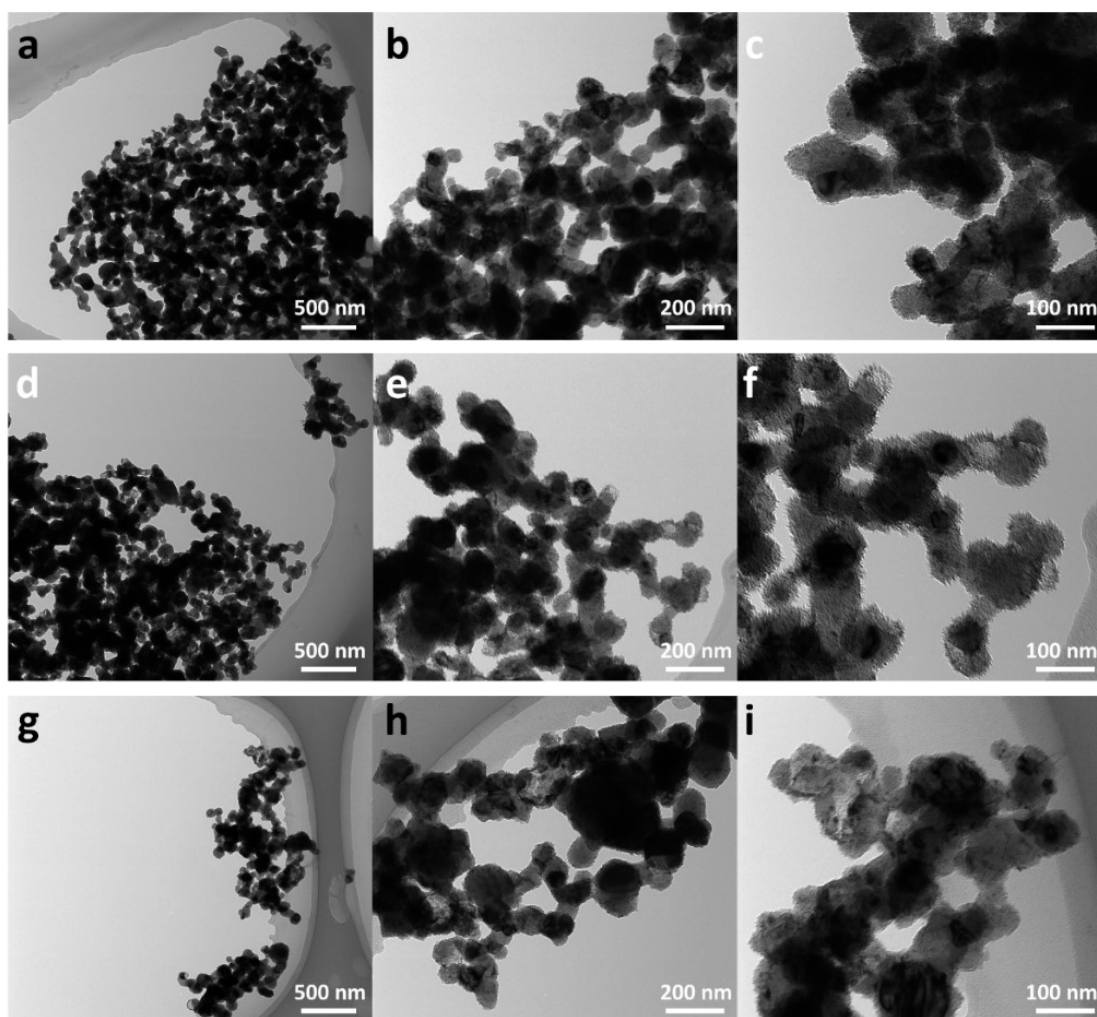

Fig. S6. AC-TEM micrograph of (a-c) LSC-D520-10/1, (d-f) LSC-D520-40/1, and (g-i) LSC-D520-5/1.

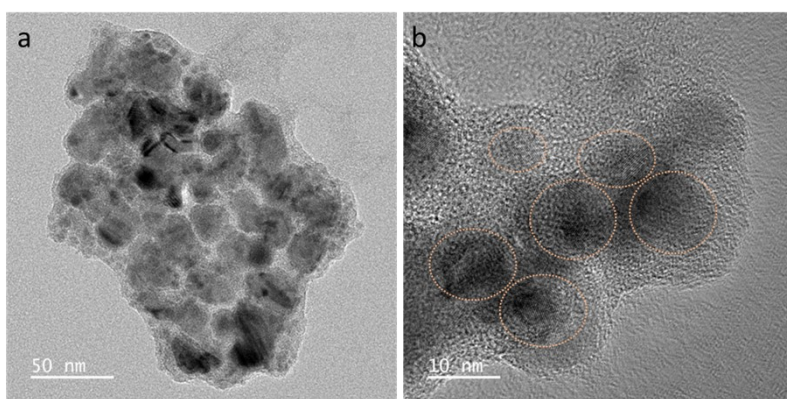

Fig. S7. TEM (a) and HR-TEM (b) images of LSC-D520-20/1 samples.

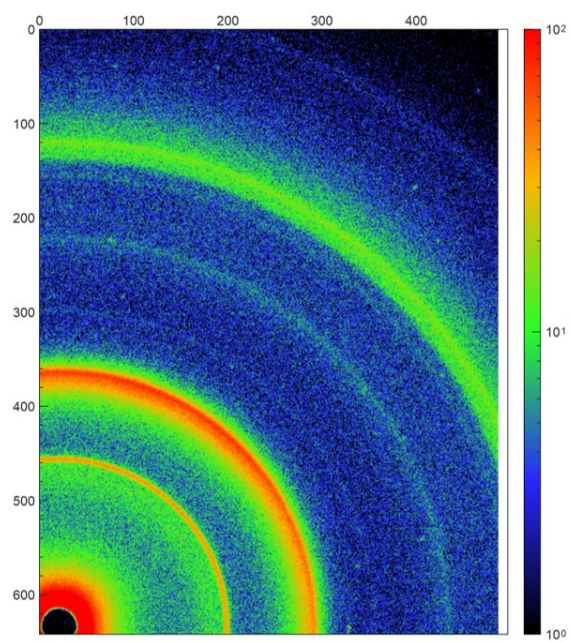

Fig. S8. 2D WAXS patterns of D520-20/1 GDE.

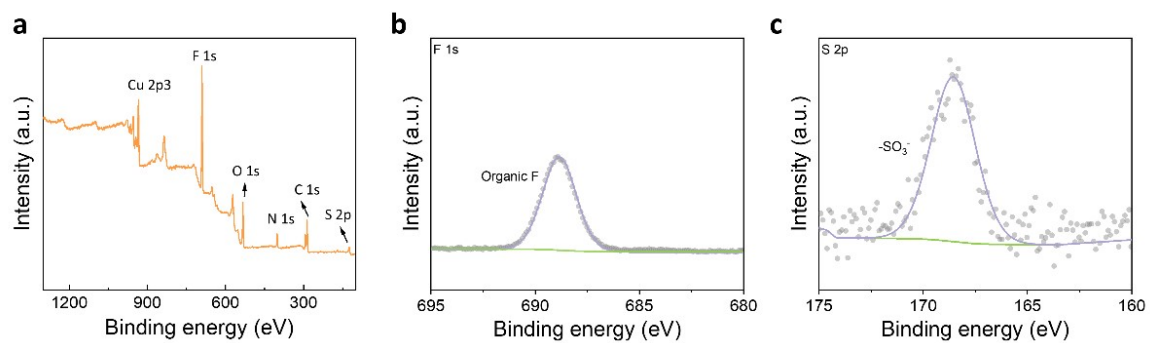

Fig. S9. (a) XPS full survey, (b) F 1s spectra, and (c) S 2p spectra of D520-20/1 GDE.

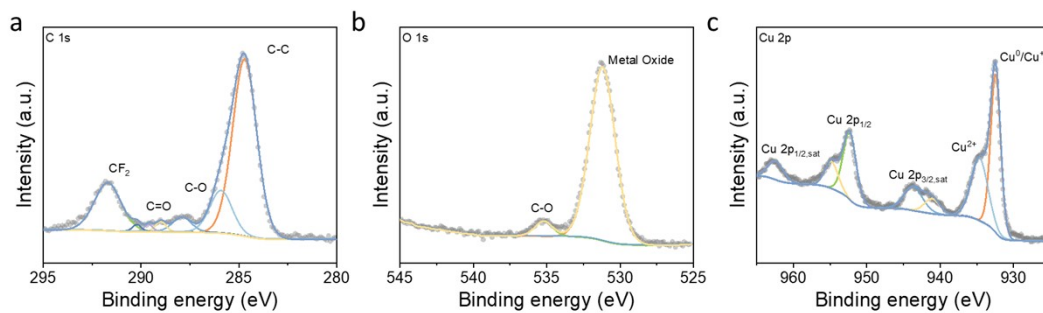

Fig. S10. XPS results of Cu-GDE without PFSA ionomer. (a) C 1s, (b) O 1s, and (c) Cu 2p spectra.

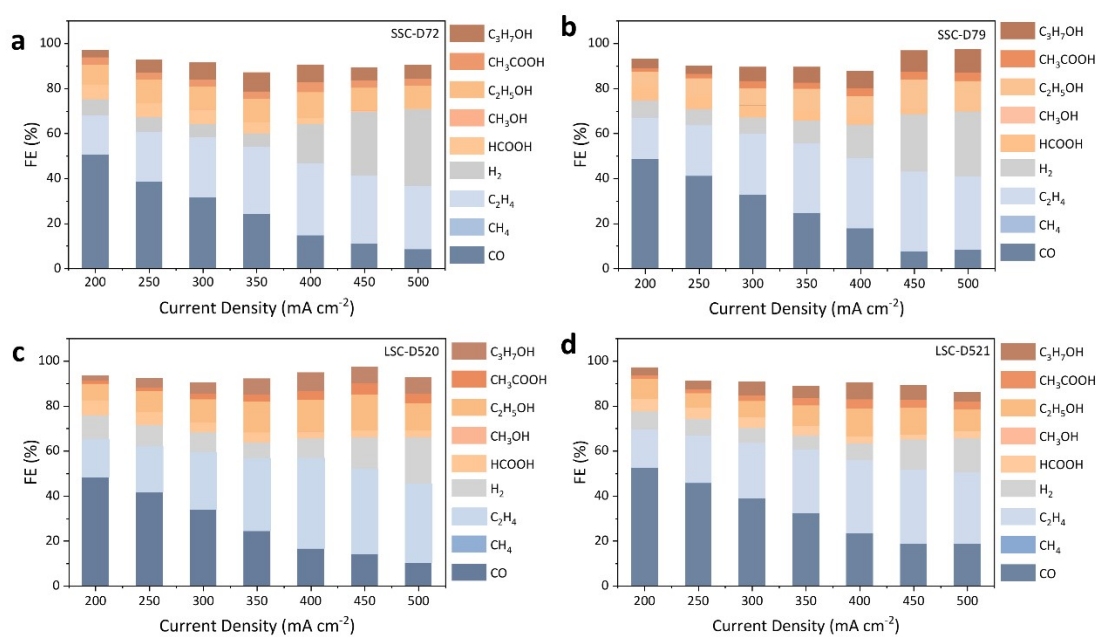

Fig. S11. Product distribution of different ionomers at different current densities.  
(a) SSC-D72, (b) SSC-D79, (c) LSC-D520, (d) LSC-D521.

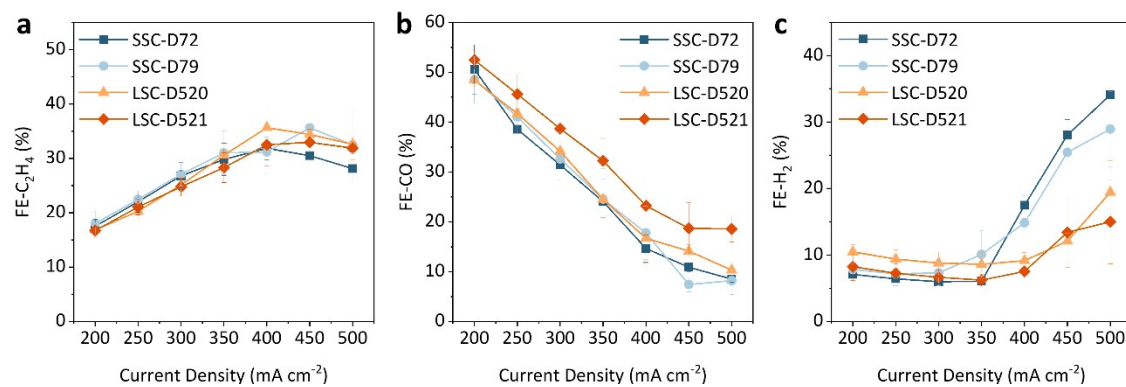

Fig. S12. FE-C<sub>2</sub>H<sub>4</sub>/CO/H<sub>2</sub> of different ionomers. (a) FE-C<sub>2</sub>H<sub>4</sub>, (b) FE-CO, (c) FE-H<sub>2</sub>.

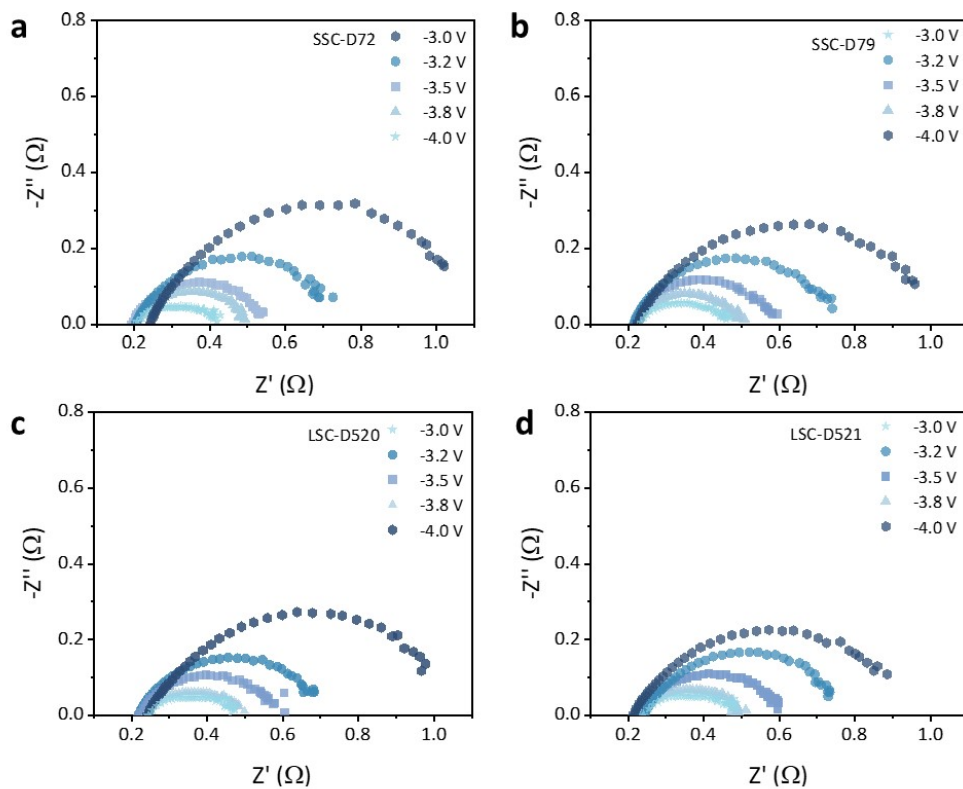

Fig. S13. EIS results of different ionomers at different cell voltages. (a) SSC-D72, (b) SSC-D79, (c) LSC-D520, (d) LSC-D521.

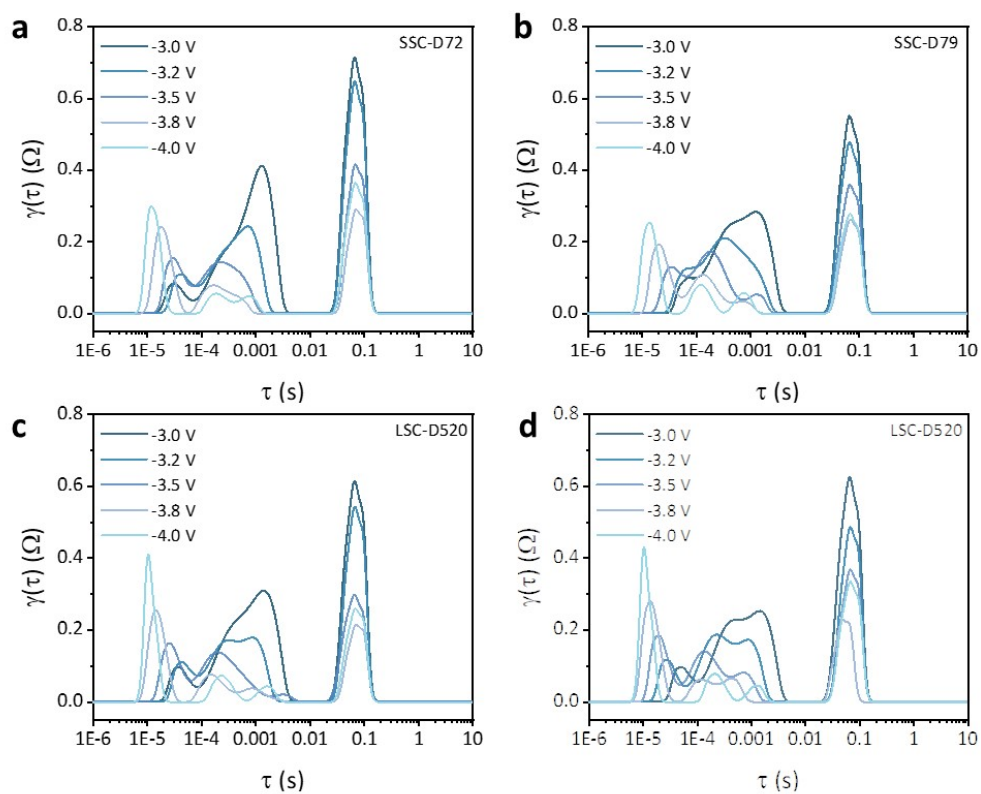

Fig. S14. DRT results of different ionomers at various cell voltages. (a) SSC-D72, (b) SSC-D79, (c) LSC-D520, (d) LSC-D521.

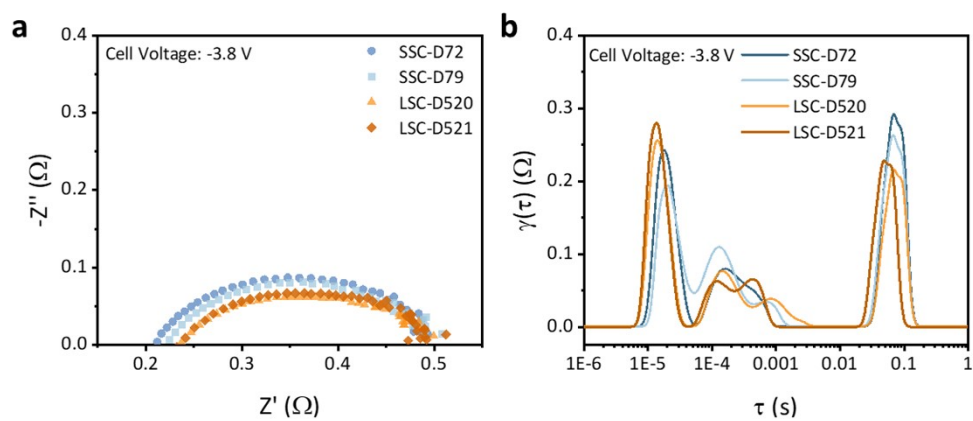

Fig. S15. EIS and DRT results of different ionomers at -3.8 V.

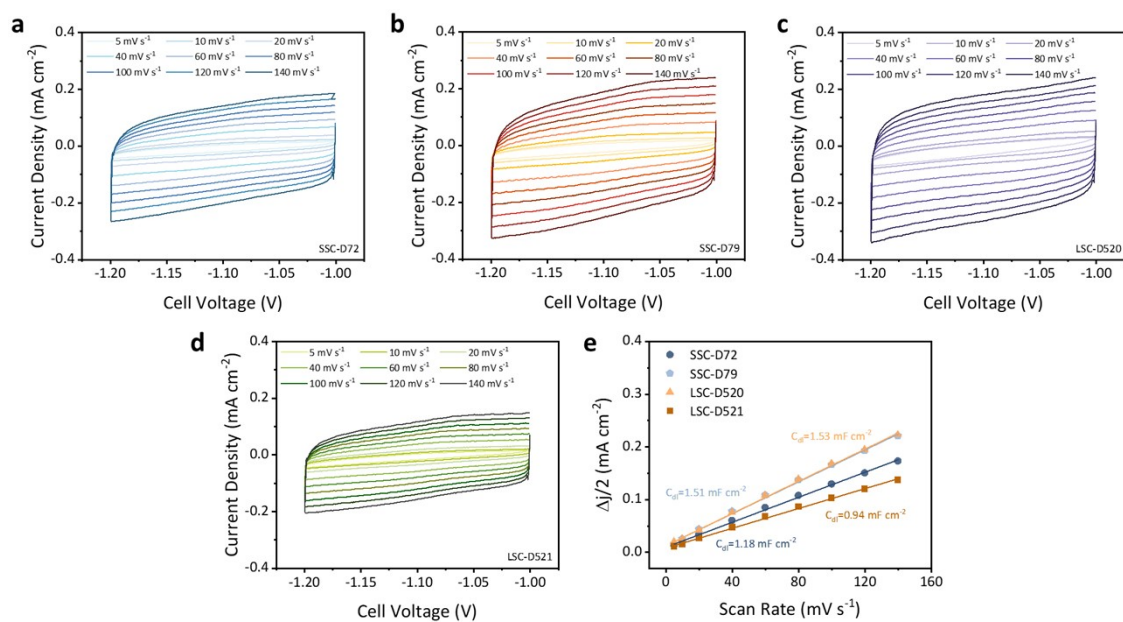

Fig. S16. (a-d) CV curves at different scan rates of SSC-D72, SSC-D79, LSC-D520, and LSC-D521. (e) The double-layer capacitance of different ionomers.

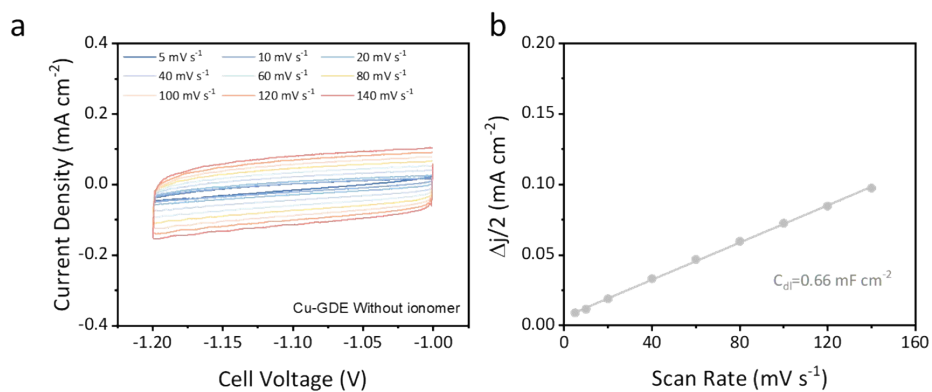

Fig. S17. (a) CV curves at different scan rates of Cu-GDE without ionomer. (b) The double-layer capacitance of Cu-GDE without ionomer.

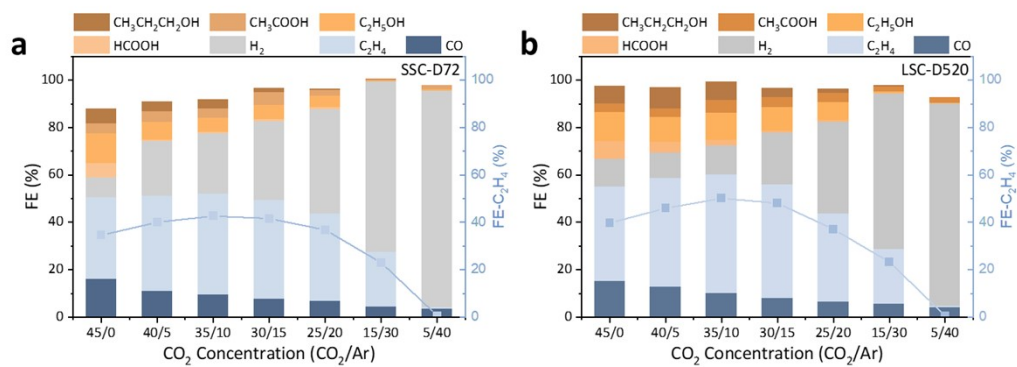

Fig. S18. Product distribution of (a) SSC-D72 and (b) LSC-D520 at different CO<sub>2</sub> concentrations.

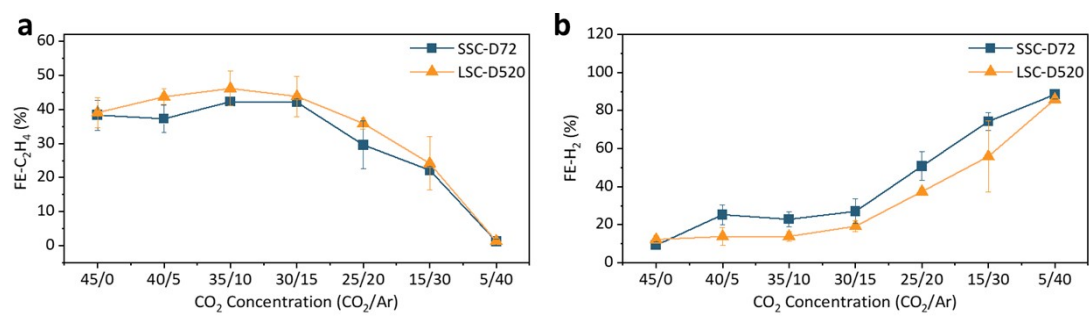

Fig. S19. Performance comparison of SSC-D72 and LSC-D520 at different CO<sub>2</sub> concentrations. (a) FE-C<sub>2</sub>H<sub>4</sub>, (b) FE-H<sub>2</sub>.

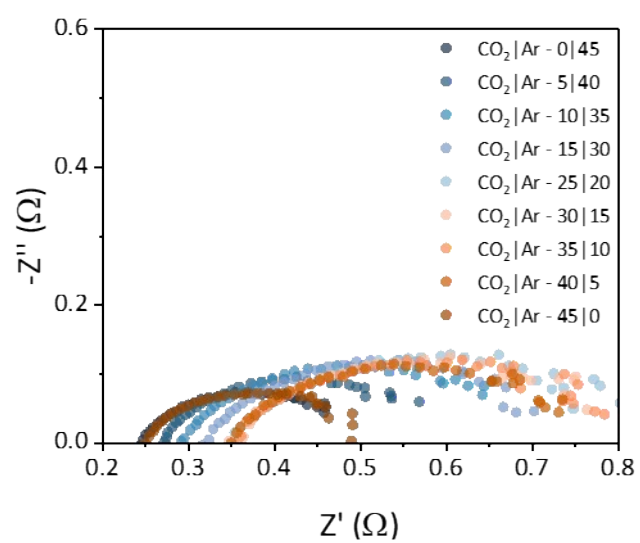

Fig. S20. EIS results of LSC-D520 at different  $\text{CO}_2$  concentration.

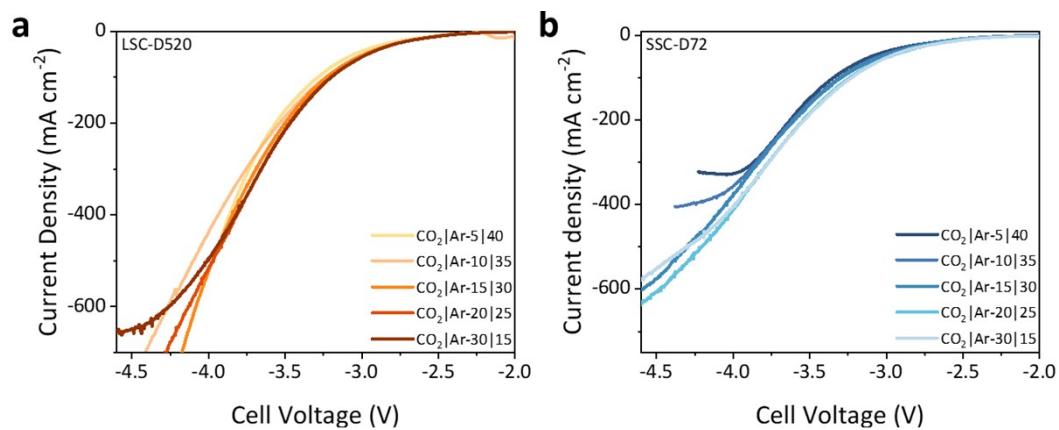

Fig. S21. LSV curves of (a) LSC-D520 and (b) SSC-D72 at various low  $\text{CO}_2$  concentrations.

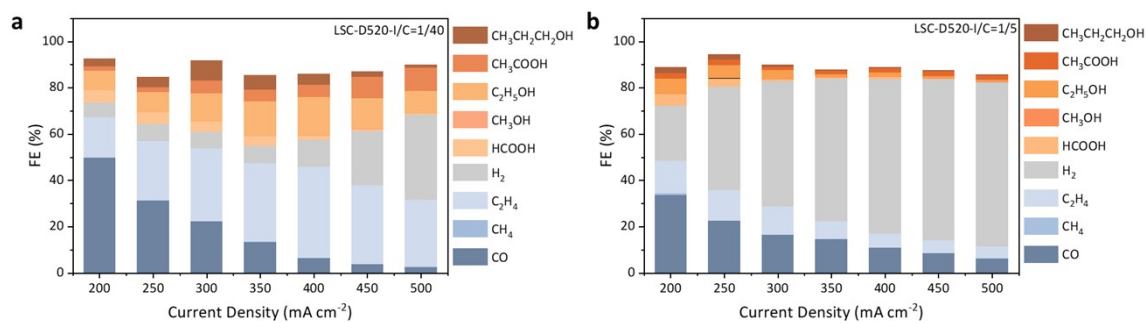

Fig. S22. Product distribution of different C/I ratios at different current densities.  
(a) C/I=40/1, (b) C/I=5/1.

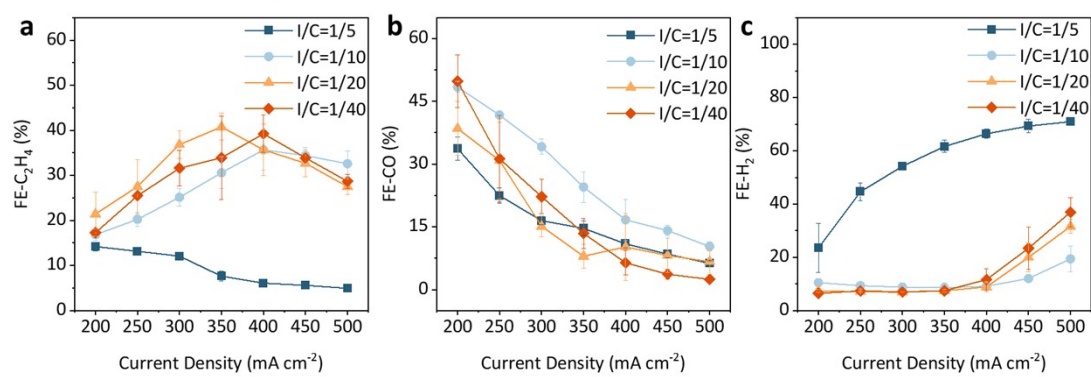

Fig. S23. FE-C<sub>2</sub>H<sub>4</sub>/CO/H<sub>2</sub> of different C/I ratio of LSC-D520. (a) FE-C<sub>2</sub>H<sub>4</sub>, (b) FE-CO, (c) FE-H<sub>2</sub>.

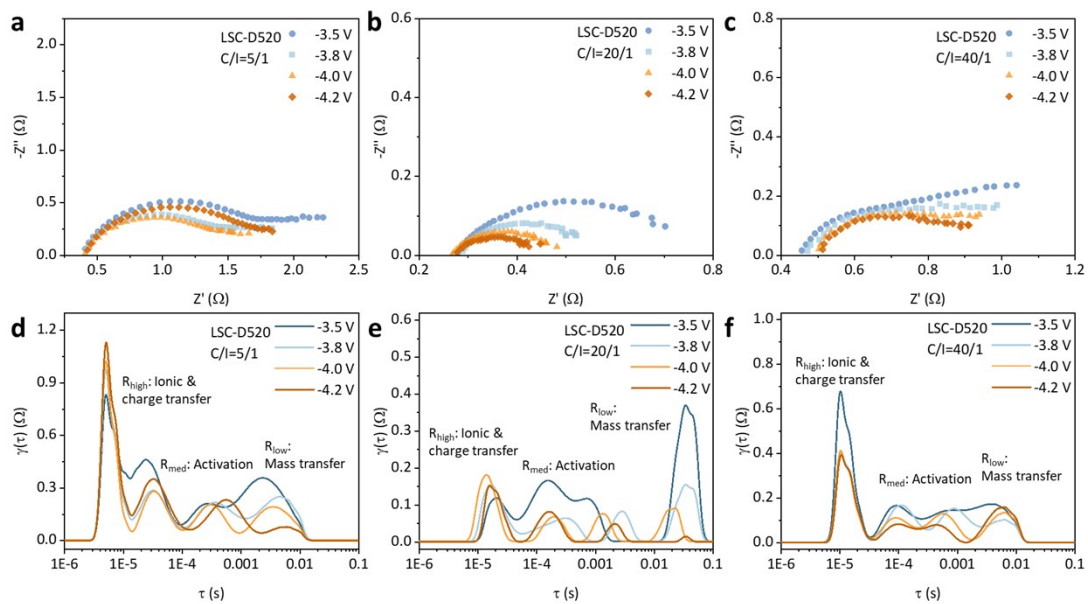

Fig. S24. EIS and DRT results of different C/I ratios of LSC-D520. (a, d) C/I=5/1, (b, e) C/I=20/1, (c, f) C/I=40/1.

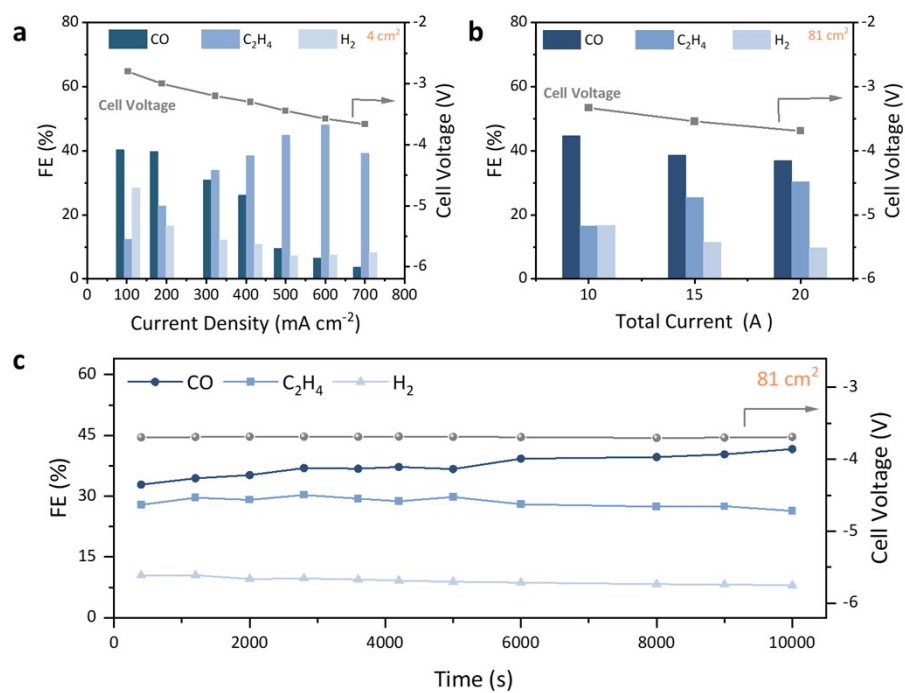

Fig. S25. Scale-up of LSC-D520-C/l=20/1. (a) 4 cm<sup>2</sup>, (b) 81 cm<sup>2</sup>, (c) Stability of 81 cm<sup>2</sup>.

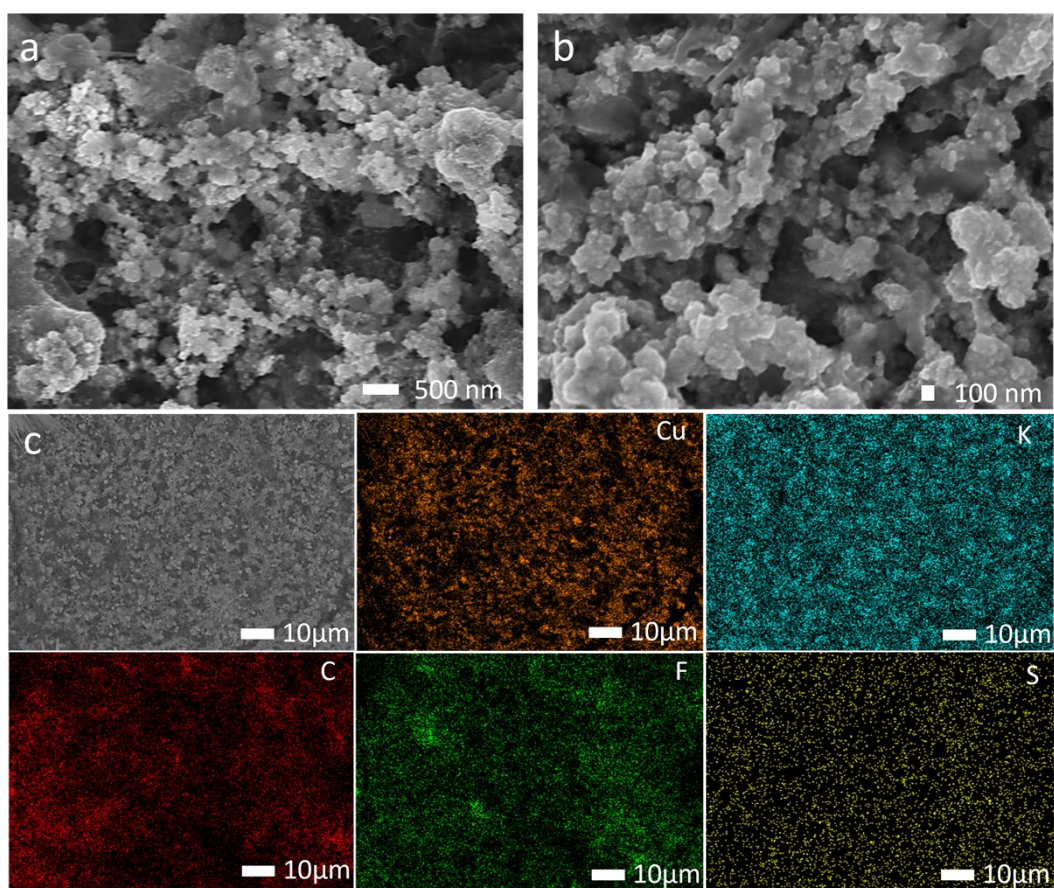

Fig. S26. The SEM images (a, b) and EDS mapping (c) of LSC-D520 Cu-GDEs surface after long-time electrolysis.

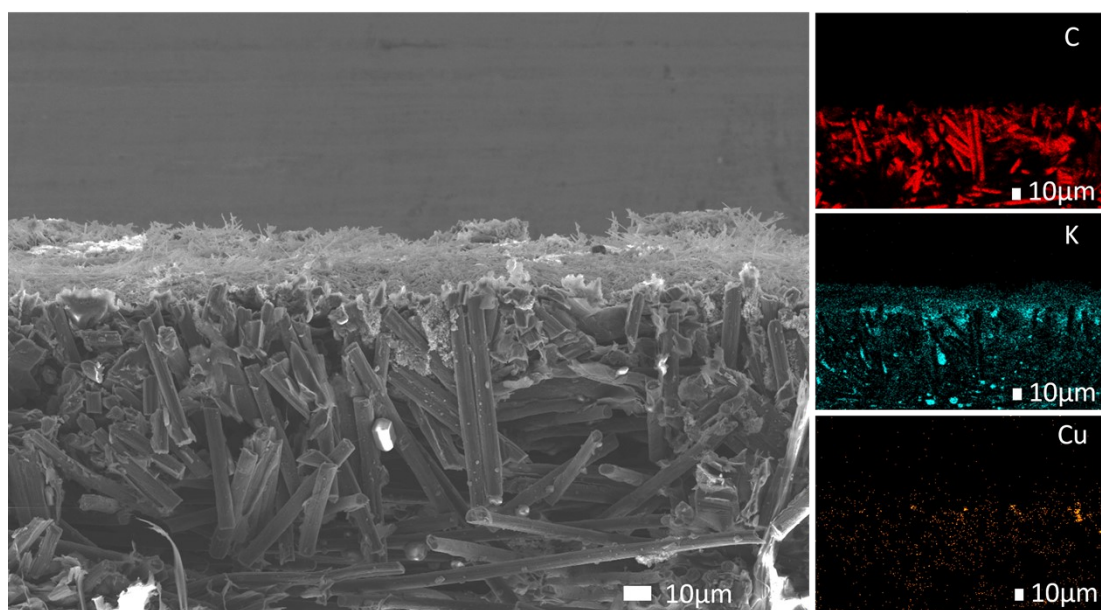

Fig. S27. SEM micrograph and EDS mapping of cross-section morphology of LSC-D520 Cu-GDEs after long-time electrolysis.

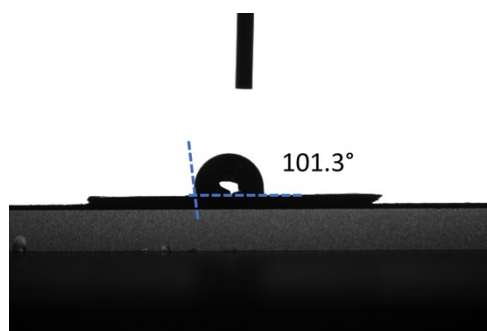

Fig. S28. XPS results of the LSC-D520 Cu-GDEs surface after long-time electrolysis.

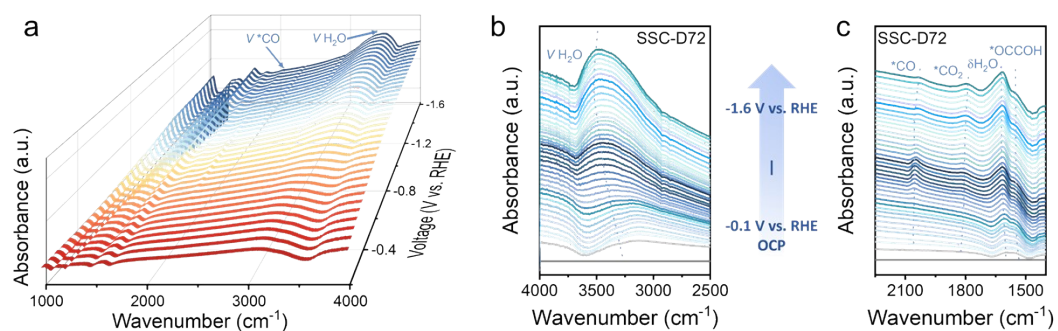

Fig. S29. *In-situ* ATR-SEIRAS of SSC-D72 (a), and magnified image of (b) signal of H<sub>2</sub>O and (c) signal of CO<sub>2</sub>.

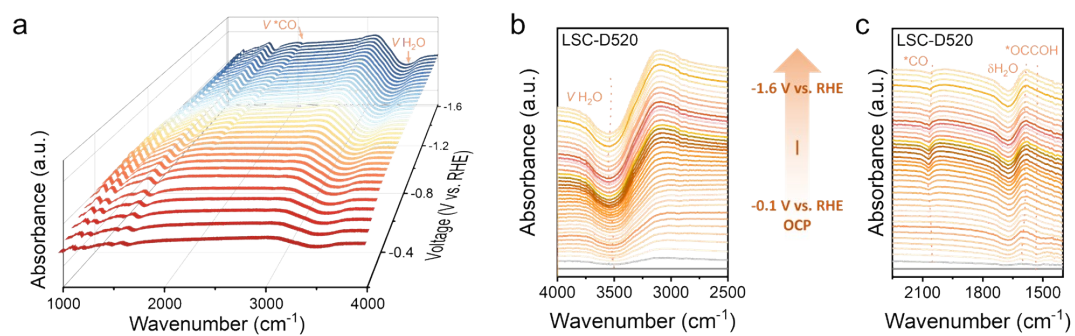

Fig. S30. *In-situ* ATR-SEIRAS of LSC-D520 (a), and magnified image of (b) signal of H<sub>2</sub>O and (c) signal of CO<sub>2</sub>.

## Tables

Table S1. Elements content analysis of LSC-D520-20/1 GDE surface based on EDS results corresponding to Fig. S3.

| Sample        | C    | F    | S    | Cu    |
|---------------|------|------|------|-------|
|               | Wt%  |      |      |       |
| LSC-D520-20/1 | 9.12 | 2.90 | 0.10 | 87.88 |

Table S2. Volume distribution of the particle size in the catalyst ink based on DLS results.

| Sample    | D50 (nm) | Size of peak (nm) |
|-----------|----------|-------------------|
| D520-40/1 | 472      | 480.2             |
| D520-20/1 | 295      | 296.9             |
| D520-10/1 | 310      | 312.8             |
| D520-5/1  | 320      | 322.8             |

Table S3. ECSA of the catalysts based on Fig. S14 (The specific capacitance considered at 40  $\mu\text{F cm}^{-2}$ ).

| Sample   | Slope ( $\text{mF cm}^{-2}$ ) | ECSA ( $\text{cm}^2$ ) |
|----------|-------------------------------|------------------------|
| SSC-D72  | 1.18                          | 29.5                   |
| SSC-D79  | 1.51                          | 37.75                  |
| LSC-D520 | 1.53                          | 38.25                  |
| LSC-D521 | 0.94                          | 23.5                   |

Table S4. Comparison of CO<sub>2</sub>RR to C<sub>2+</sub> performance in various devices.

| Catalyst                                               | Current Density (mA cm <sup>-2</sup> ) | FE-C <sub>2+</sub> (%) | J <sub>C2+</sub> (mA cm <sup>-2</sup> ) | Electrolyser | Reference                                           |
|--------------------------------------------------------|----------------------------------------|------------------------|-----------------------------------------|--------------|-----------------------------------------------------|
| CuFONC                                                 | ~25                                    | 80.5                   | ~20                                     | H-cell       | <i>Adv. Energy Mater</i> , 2024 <sup>[2]</sup>      |
| La <sub>1.8</sub> Ag <sub>0.2</sub> CuO <sub>3.8</sub> | 26                                     | 86.4                   | 22.7                                    | H-cell       | <i>Appl. Catal. B-Environ</i> , 2024 <sup>[3]</sup> |
| Cu-N-3                                                 | 43.5                                   | 81.9                   | 35.6                                    | H-cell       | <i>J. Am. Chem. Soc</i> , 2023 <sup>[4]</sup>       |
| ON-CuO                                                 | 34.6                                   | 77                     | 26.6                                    | H-cell       | <i>ACS Catal</i> , 2023 <sup>[5]</sup>              |
| Cu <sub>2</sub> -CuN <sub>3</sub>                      | 28                                     | 73                     | 20.6                                    | H-cell       | <i>Nat. Com</i> , 2022 <sup>[6]</sup>               |
| Cu-CuAlO <sub>2</sub> -Al <sub>2</sub> O <sub>3</sub>  | 61.1                                   | 85                     | 51.9                                    | H-cell       | <i>J. Am. Chem. Soc</i> , 2022 <sup>[7]</sup>       |
| Cu <sub>500</sub> Ag <sub>1000</sub>                   | 400                                    | 40                     | 160                                     | Flow cell    | <i>Joule</i> , 2020 <sup>[8]</sup>                  |
| N-modified Cu                                          | 400                                    | 82.3                   | 329                                     | Flow cell    | <i>Nat. Com</i> , 2021 <sup>[9]</sup>               |
| Fragmented Cu                                          | 300                                    | 77.8                   | 233                                     | Flow cell    | <i>J. Am. Chem. Soc</i> , 2022 <sup>[10]</sup>      |
| Cu-HoMSs                                               | 667                                    | 77                     | 513.7                                   | Flow cell    | <i>Angew. Chem. Int. Ed</i> , 2022 <sup>[11]</sup>  |
| BiCu-SAA                                               | 400                                    | 73.4                   | 294                                     | Flow cell    | <i>Angew. Chem. Int. Ed</i> , 2023 <sup>[12]</sup>  |
| Al-Cu/Cu <sub>2</sub> O                                | 638                                    | 84.5                   | 539                                     | Flow cell    | <i>J. Am. Chem. Soc</i> , 2023 <sup>[13]</sup>      |
| Gd <sub>1</sub> /CuO <sub>x</sub>                      | 545                                    | 81.4                   | 444                                     | Flow cell    | <i>J. Am. Chem. Soc</i> , 2023 <sup>[14]</sup>      |
| Cu(OH)BTA                                              | 500                                    | 73                     | 365                                     | Flow cell    | <i>Nat. Com</i> , 2023 <sup>[15]</sup>              |
| Cu <sub>0.5</sub> Zn <sub>0.5</sub> O <sub>x</sub>     | 250                                    | 76                     | 190                                     | Flow cell    | <i>J. Am. Chem. Soc</i> , 2023 <sup>[16]</sup>      |
| Cu <sub>2</sub> O-NS                                   | ~190                                   | 81.32                  | 154                                     | Flow cell    | <i>J. Am. Chem. Soc</i> , 2023 <sup>[17]</sup>      |
| NS-Cu <sub>2</sub> O                                   | 351                                    | 81.7                   | 286                                     | Flow cell    | <i>Adv. Mater</i> , 2024 <sup>[18]</sup>            |
| <b>Cu-NPs</b>                                          | <b>600</b>                             | <b>89.4</b>            | <b>536</b>                              | <b>MEA</b>   | <b>This Work</b>                                    |

Table S5. Comparison of CO<sub>2</sub>RR to C<sub>2+</sub> performance in MEA setup.

| Catalyst                                      | Current Density (mA cm <sup>-2</sup> ) | Cell Voltage (V) | FE-C <sub>2+</sub> (%) | Partial Current-C <sub>2+</sub> (A) | Reference                                          |
|-----------------------------------------------|----------------------------------------|------------------|------------------------|-------------------------------------|----------------------------------------------------|
| <b>Cu-NPs</b>                                 | <b>600</b>                             | <b>3.57</b>      | <b>89.4</b>            | <b>2.15</b>                         | <b><i>This Work</i></b>                            |
| Cu-250nm                                      | 200                                    | 3.9              | 80                     | 0.8                                 | <i>Joule</i> , 2019 <sup>[19]</sup>                |
| Modified Cu                                   | 120                                    | 3.65             | ~80                    | 0.48                                | <i>Nature</i> , 2020 <sup>[20]</sup>               |
| Cu/FeTPP                                      | 120                                    | 3.7              | ~76                    | 0.46                                | <i>Nat. Catal</i> , 2020 <sup>[21]</sup>           |
| SSC@Cu-PTFE                                   | 200                                    | 3.9              | ~75                    | 0.75                                | <i>Science</i> , 2021 <sup>[22]</sup>              |
| Cu <sub>DS</sub>                              | ~200                                   | 3.5              | ~70                    | 0.70                                | <i>Joule</i> , 2021 <sup>[23]</sup>                |
| N2SN-Ag-Cu                                    | 327                                    | 4.5              | 80                     | 1.05                                | <i>Nat. Com</i> , 2021 <sup>[24]</sup>             |
| Cu-PTFE                                       | 175                                    | 3.8              | 80                     | 0.7                                 | <i>ACS Energy Lett</i> , 2021 <sup>[25]</sup>      |
| Sputtered Cu                                  | 700                                    | 3.68             | ~70                    | 0.78                                | <i>Nat. Energy</i> , 2022 <sup>[26]</sup>          |
| Cu <sub>2</sub> P <sub>2</sub> O <sub>7</sub> | 350                                    | 3.36             | 73.6                   | 1.03                                | <i>Angew. Chem. Int. Ed</i> , 2022 <sup>[27]</sup> |
| C/HKUST-1/Cu/PTFE                             | 250                                    | 3.8              | ~75                    | 0.94                                | <i>Adv. Mater</i> , 2022 <sup>[28]</sup>           |
| Cu NPs                                        | 400                                    | 3.65             | 70.2                   | 1.4                                 | <i>Nat. Energy</i> , 2023 <sup>[29]</sup>          |
| Cu(OH)BTA                                     | 241                                    | 3.8              | 73                     | 0.70                                | <i>Nat. Com</i> , 2023 <sup>[15]</sup>             |
| Cu(100)                                       | 300                                    | 3.8              | 83                     | 0.25                                | <i>Nat. Com</i> , 2024 <sup>[30]</sup>             |

## Reference:

1. A. Reyes, R. P. Jansonius, B. A. W. Mowbray, Y. Cao, D. G. Wheeler, J. Chau, D. J. Dvorak and C. P. Berlinguette, *ACS Energy Lett.*, 2020, **5**, 1612-1618.
2. Z. Lv, C. Wang, Y. Liu, R. Liu, F. Zhang, X. Feng, W. Yang and B. Wang, *Adv. Energy Mater.*, 2024, DOI: 10.1002/aenm.202400057.
3. G. Dong, G. Wang, J. Cheng, M. Li, Z. Liang, D. Geng and W. Tang, *Appl. Catal., B*, 2024, **342**.
4. W. Xia, Y. Xie, S. Jia, S. Han, R. Qi, T. Chen, X. Xing, T. Yao, D. Zhou, X. Dong, J. Zhai, J. Li, J. He, D. Jiang, Y. Yamauchi, M. He, H. Wu and B. Han, *Journal of the American Chemical Society*, 2023, **145**, 17253-17264.
5. D. G. Park, J. W. Choi, H. Chun, H. S. Jang, H. Lee, W. H. Choi, B. C. Moon, K.-H. Kim, M. G. Kim, K. M. Choi, B. Han and J. K. Kang, *ACS Catal.*, 2023, **13**, 9222-9233.
6. X. Su, Z. Jiang, J. Zhou, H. Liu, D. Zhou, H. Shang, X. Ni, Z. Peng, F. Yang, W. Chen, Z. Qi, D. Wang and Y. Wang, *Nat. Commun.*, 2022, **13**.
7. X. Wang, Y. Jiang, K. Mao, W. Gong, D. Duan, J. Ma, Y. Zhong, J. Li, H. Liu, R. Long and Y. Xiong, *Journal of the American Chemical Society*, 2022, **144**, 22759-22766.
8. C. Chen, Y. Li, S. Yu, S. Louisia, J. Jin, M. Li, M. B. Ross and P. Yang, *Joule*, 2020, **4**, 1688-1699.
9. J.-Y. Kim, D. Hong, J.-C. Lee, H. G. Kim, S. Lee, S. Shin, B. Kim, H. Lee, M. Kim, J. Oh, G.-D. Lee, D.-H. Nam and Y.-C. Joo, *Nat. Commun.*, 2021, **12**, 3765.
10. K. Yao, J. Li, H. Wang, R. Lu, X. Yang, M. Luo, N. Wang, Z. Wang, C. Liu, T. Jing, S. Chen, E. Cortés, S. A. Maier, S. Zhang, T. Li, Y. Yu, Y. Liu, X. Kang and H. Liang, *Journal of the American Chemical Society*, 2022, **144**, 14005-14011.
11. C. Liu, M. Zhang, J. Li, W. Xue, T. Zheng, C. Xia and J. Zeng, *Angew. Chem. Int. Ed.*, 2021, **61**.
12. Y. Cao, S. Chen, S. Bo, W. Fan, J. Li, C. Jia, Z. Zhou, Q. Liu, L. Zheng and F. Zhang, *Angew. Chem. Int. Ed.*, 2023, **62**.
13. L. Zhang, J. Feng, L. Wu, X. Ma, X. Song, S. Jia, X. Tan, X. Jin, Q. Zhu, X. Kang, J. Ma, Q. Qian, L. Zheng, X. Sun and B. Han, *Journal of the American Chemical Society*, 2023, **145**, 21945-21954.
14. J. Feng, L. Wu, S. Liu, L. Xu, X. Song, L. Zhang, Q. Zhu, X. Kang, X. Sun and B. Han, *Journal of the American Chemical Society*, 2023, **145**, 9857-9866.
15. Y. Liang, J. Zhao, Y. Yang, S.-F. Hung, J. Li, S. Zhang, Y. Zhao, A. Zhang, C. Wang, D. Appadoo, L. Zhang, Z. Geng, F. Li and J. Zeng, *Nat. Commun.*, 2023, **14**, 474.
16. C.-J. Chang, Y.-A. Lai, Y.-C. Chu, C.-K. Peng, H.-Y. Tan, C.-W. Pao, Y.-G. Lin, S.-F. Hung, H.-C. Chen and H. M. Chen, *Journal of the American Chemical Society*, 2023, **145**, 6953-6965.
17. P. Wang, S. Meng, B. Zhang, M. He, P. Li, C. Yang, G. Li and Z. Li, *Journal of the American Chemical Society*, 2023, **145**, 26133-26143.
18. C. Li, T. Zhang, H. Liu, Z. Guo, Z. Liu, H. Shi, J. Cui, H. Li, H. Li and C. Li, *Adv. Mater.*, 2024, DOI: 10.1002/adma.202312204.
19. C. M. Gabardo, C. P. O'Brien, J. P. Edwards, C. McCallum, Y. Xu, C.-T. Dinh, J. Li, E. H. Sargent and D. Sinton, *Joule*, 2019, **3**, 2777-2791.
20. F. Li, A. Thevenon, A. Rosas-Hernandez, Z. Wang, Y. Li, C. M. Gabardo, A. Ozden, C. T. Dinh, J. Li, Y. Wang, J. P. Edwards, Y. Xu, C. McCallum, L. Tao, Z. Q. Liang, M. Luo, X. Wang, H. Li, C. P. O'Brien, C. S. Tan, D. H. Nam, R. Quintero-Bermudez, T. T. Zhuang, Y. C. Li, Z. Han, R. D. Britt, D. Sinton, T. Agapie, J. C. Peters and E. H. Sargent, *Nature*, 2020, **577**, 509-513.

21. F. Li, Y. C. Li, Z. Wang, J. Li, D.-H. Nam, Y. Lum, M. Luo, X. Wang, A. Ozden, S.-F. Hung, B. Chen, Y. Wang, J. Wicks, Y. Xu, Y. Li, C. M. Gabardo, C.-T. Dinh, Y. Wang, T.-T. Zhuang, D. Sinton and E. H. Sargent, *Nat. Catal.*, 2019, **3**, 75-82.
22. F. P. G. d. Arquer, *Science*, 2020, **367**, 661-666.
23. Z. Gu, H. Shen, Z. Chen, Y. Yang, C. Yang, Y. Ji, Y. Wang, C. Zhu, J. Liu, J. Li, T.-K. Sham, X. Xu and G. Zheng, *Joule*, 2021, **5**, 429-440.
24. H. Wu, J. Li, K. Qi, Y. Zhang, E. Petit, W. Wang, V. Flaud, N. Onofrio, B. Rebicre, L. Huang, C. Salameh, L. Lajaunie, P. Miele and D. Voiry, *Nat. Commun.*, 2021, **12**, 7210.
25. Y. Xu, J. P. Edwards, S. Liu, R. K. Miao, J. E. Huang, C. M. Gabardo, C. P. O'Brien, J. Li, E. H. Sargent and D. Sinton, *ACS Energy Lett.*, 2021, **6**, 809-815.
26. W. Li, Z. Yin, Z. Gao, G. Wang, Z. Li, F. Wei, X. Wei, H. Peng, X. Hu, L. Xiao, J. Lu and L. Zhuang, *Nat. Energy*, 2022, **7**, 835-843.
27. J. Sang, P. Wei, T. Liu, H. Lv, X. Ni, D. Gao, J. Zhang, H. Li, Y. Zang, F. Yang, Z. Liu, G. Wang and X. Bao, *Angew Chem Int Ed Engl*, 2022, **61**, e202114238.
28. C. A. Obasanjo, G. Gao, J. Crane, V. Golovanova, F. P. Garcia de Arquer and C. T. Dinh, *Nat. Commun.*, 2023, **14**, 3176.
29. A. Ozden, J. Li, S. Kandambeth, X.-Y. Li, S. Liu, O. Shekhah, P. Ou, Y. Zou Finfrock, Y.-K. Wang, T. Alkayyali, F. Pelayo García de Arquer, V. S. Kale, P. M. Bhatt, A. H. Ip, M. Eddaoudi, E. H. Sargent and D. Sinton, *Nat. Energy*, 2023, **8**, 179-190.
30. K. Yao, J. Li, A. Ozden, H. Wang, N. Sun, P. Liu, W. Zhong, W. Zhou, J. Zhou, X. Wang, H. Liu, Y. Liu, S. Chen, Y. Hu, Z. Wang, D. Sinton and H. Liang, *Nat. Commun.*, 2024, **15**, 1749.
